# Supplementary material for: Crystal structure of tyrosine decarboxylase and identification of key residues involved in conformational swing and substrate binding
Source: PubMed Central journal article supplement (PMC4904194; doi:10.1038/srep27779), 2016-06-13
Supplement: srep27779-s1.pdf [file srep27779-s1.pdf]

## Supplementary Information

### Crystal structure of tyrosine decarboxylase and identification of key residues involved in conformational swing and substrate binding

**Haixia Zhu<sup>1,2</sup>, Guochao Xu<sup>1</sup>, Kai Zhang<sup>1</sup>, Xudong Kong<sup>3</sup>, Ruizhi Han<sup>1</sup>, Jiahai Zhou<sup>2,\*</sup> and Ye Ni<sup>1,\*</sup>**

*<sup>1</sup>The Key Laboratory of Industrial Biotechnology, Ministry of Education, School of Biotechnology, Jiangnan University, Wuxi 214122, Jiangsu, Peoples R China*

*<sup>2</sup>Shanghai Institute of Organic Chemistry, State Key Laboratory of Bioorganic & Natural Products Chemistry, Chinese Academy of Sciences, Shanghai 200032, Peoples R China*

*<sup>3</sup>State Key Laboratory of Bioreactor Engineering, School of Biotechnology, East China University of Science and Technology, Shanghai 200237, Peoples R. China*

\*Corresponding authors: **Prof. Y. Ni**, [yni@jiangnan.edu.cn](mailto:yni@jiangnan.edu.cn)

**Prof. J. H. Zhou**, [jiahai@mail.sioc.ac.cn](mailto:jiahai@mail.sioc.ac.cn)

**Table S1** Primers used in this study.

|         |                        |         |                        |
|---------|------------------------|---------|------------------------|
| H98A-F  | TGGGGTGC AATGAATTCAGAG | S586G-F | CGCGCTGGTGT TATGACGCCG |
| H98A-R  | ATTCATTGCACCCCAATAACG  | S586G-R | CATAACACCAGCGCGAATGAT  |
| M99A-F  | GGTCACGCAAATTCAGAGACC  | S586V-F | CGCGCTGTTGTTATGACGCCG  |
| M99A-R  | TGAATTTGCGTGACCCCAATA  | S586V-R | CATAACAACAGCGCGAATGAT  |
| N100A-F | CACATGGCATCAGAGACCCTA  | S586L-F | CGCGCTCTGGTTATGACGCCG  |
| N100A-R | CTCTGATGCCATGTGACCCCA  | S586L-R | CATAACCAGAGCGCGAATGAT  |
| S101A-F | ATGAATGCAGAGACCCTAATG  | S586I-F | CGCGCTATTGTTATGACGCCG  |
| S101A-R | GGTCTCTGCATTCATGTGACC  | S586I-R | CATAACAATAGCGCGAATGAT  |
| E102A-F | AATTCAGCAACCCTAATGCCT  | S586M-F | CGCGCTATGGTTATGACGCCG  |
| E102A-R | TAGGGTTGCTGAATTCATGTG  | S586M-R | CATAACCATAGCGCGAATGAT  |
| T103A-F | TCAGAGGCACTAATGCCTGCT  | S586P-F | CGCGCTCCGGTTATGACGCCG  |
| T103A-R | CATTAGTGCCTCTGAATTCAT  | S586P-R | CATAACCGGAGCGCGAATGAT  |
| K240A-F | CAAACGGCACATTATTCTTGG  | S586F-F | CGCGCTTTTGT TATGACGCCG |
| K240A-R | ATAATGTGCCGTTTGTGGTAC  | S586F-R | CATAACAAAAGCGCGAATGAT  |
| H241A-F | ACGAAGGCATATTCTTGGATC  | S586W-F | CGCGCTTGGGTTATGACGCCG  |
| H241A-R | AGAATATGCCTTCGTTTGTGG  | S586W-R | CATAACCCAAGCGCGAATGAT  |
| V294A-F | GTTGGTGCAGCCGGATCAACT  | S586C-F | CGCGCTTGTGTTATGACGCCG  |
| V294A-R | TCCGGCTGCACCAACCACGCC  | S586C-R | CATAACACAAGCGCGAATGAT  |
| A295F-F | GGTGTGTTTGGATCAACTGAA  | S586T-F | CGCGCTACCGTTATGACGCCG  |
| A295F-R | TGATCCAAACACACCAACCAC  | S586T-R | CATAACGGTAGCGCGAATGAT  |
| G296F-F | GTGGCCTTTTCAACTGAAGAA  | S586N-F | CGCGCTAATGTTATGACGCCG  |
| G296F-R | AGTTGAAAAGGCCACACCAAC  | S586N-R | CATAACATTAGCGCGAATGAT  |
| S297A-F | GCCGGAGCAACTGAAGAAGGT  | S586Q-F | CGCGCTCAGGTTATGACGCCG  |
| S297A-R | TTCAGTTGCTCCGGCCACACC  | S586Q-R | CATAACCTGAGCGCGAATGAT  |
| T298A-F | GGATCAGCAGAAGAAGGTGCC  | S586Y-F | CGCGCTTATGTTATGACGCCG  |
| T298A-R | TTCTTCTGCTGATCCGGCCAC  | S586Y-R | CATAACATAAGCGCGAATGAT  |
| E299A-F | TCAACTGCAGAAGGTGCCGTT  | S586K-F | CGCGCTAAAGTTATGACGCCG  |
| E299A-R | ACCTTCTGCAGTTGATCCGGC  | S586K-R | CATAACTTTAGCGCGAATGAT  |
| Y331A-F | GCTGCAGCAGGTGGATATGCT  | S586R-F | CGCGCTCGTGTTATGACGCCG  |
| Y331A-R | TCCACCTGCTGCAGCATCTAC  | S586R-R | CATAACACGAGCGCGAATGAT  |
| H391A-F | GATCCCGCAAAGATGGGATAT  | S586H-F | CGCGCTCATGTTATGACGCCG  |
| H391A-R | CATCTTTGCGGGATCAATTGT  | S586H-R | CATAACATGAGCGCGAATGAT  |
| G394F-F | AAGATGTTTTATGTACCATAC  | S586D-F | CGCGCTGATGTTATGACGCCG  |
| G394F-R | TACATAAAACATCTTATGGGG  | S586D-R | CATAACATCAGCGCGAATGAT  |

|         |                       |         |                       |
|---------|-----------------------|---------|-----------------------|
| Y395A-F | ATGGGAGCAGTACCATACTCG | S586E-F | CGCGCTGAAGTTATGACGCCG |
| Y395A-R | TGGTACTGCTCCCATCTTATG | S586E-R | CATAACTTCAGCGCGAATGAT |
| V396A-F | GGATATGCACCATACTCGGCT | H241R-F | ACGAAGCGTTATTCTTGGATG |
| V396A-R | GTATGGTGCATATCCCATCTT | H241R-R | AGAATAACGCTTCGTTTGTGG |
| P397A-F | TATGTAGCATACTCGGCTGGG | H241w-F | ACGAAGTGGTATTCTTGGATG |
| P397A-R | CGAGTATGCTACATATCCCAT | H241w-R | AGAATACCACTTCGTTTGTGG |
| Y398A-F | GTACCAGCATCGGCTGGGGGC | H241L-F | ACGAAGCTGTATTCTTGGATG |
| Y398A-R | AGCCGATGCTGGTACATATCC | H241L-R | AGAATACAGCTTCGTTTGTGG |
| M505A-F | TTCAATGCAGTTGACTATGTT | H241S-F | ACGAAGAGCTATTCTTGGATG |
| M505A-R | GTCAACTGCATTGAAGTCAGG | H241S-R | AGAATAGCTCTTCGTTTGTGG |
| S586A-F | CGCGCTGCAGTTATGACGCCG | H241D-F | ACGAAGGATTATTCTTGGATG |
| S586A-R | CATAACTGCAGCGCGAATGAT | H241D-R | AGAATAATCCTTCGTTTGTGG |
| M588A-F | TCGGTTGCAACGCCGTATATG | H241F-F | ACGAAGTTTTATTCTTGGATG |
| M588A-R | CGGCGTTGCAACCGAAGCGCG | H241F-R | AGAATAAACTTCGTTTGTGG  |
| Y398F-F | GTACCATTTTCGGCTGGGGGC | H241N-F | ACGAAGAATTATTCTTGGATG |
| Y398F-R | AGCCGAAAATGGTACATATCC | H241N-R | AGAATAATTCTTCGTTTGTGG |

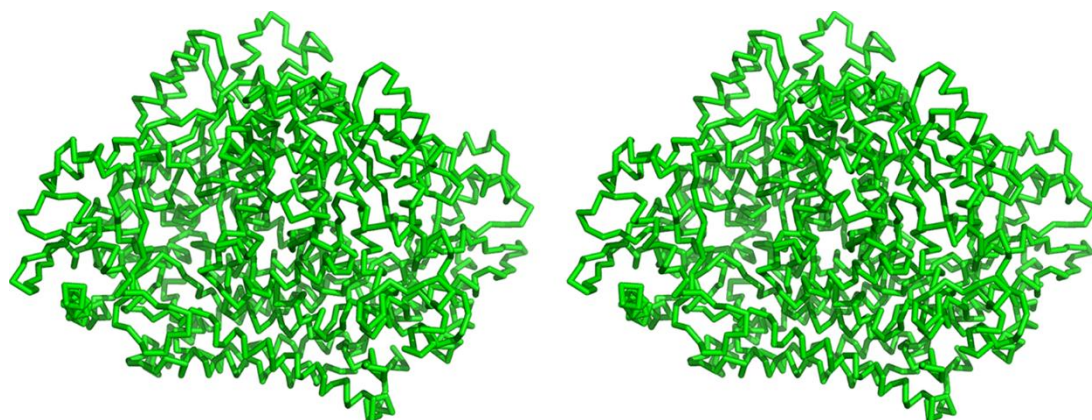

**Figure S1** Stereo image of the entire structure of *LbTDC*.
